# Supplementary material for: Molecular Individual-Based Approach on Triatoma brasiliensis: Inferences on Triatomine Foci, Trypanosoma cruzi Natural Infection Prevalence, Parasite Diversity and Feeding Sources
Source: PLoS Negl Trop Dis. 2016 Feb 18;10(2):e0004447. doi: 10.1371/journal.pntd.0004447 (PMC4758651; doi:10.1371/journal.pntd.0004447)
Supplement: S2 File — (PDF) [file pntd.0004447.s002.pdf]

Variable positions in the 467 bp of the cytb gene for the 28 haplotypes of *T. brasiliensis* collected in the study according to sites where they were collected

| Hap    | Nucleotide sites |   |   |   |   |   |   |   |   |   |   |   |   |   |   |   |   |   |   |   |   |   |   |   |   |   |   |   | Populations |   |   |   |   | Hap number | Hap frequency | GeneBank code |    |      |          |          |          |          |          |          |
|--------|------------------|---|---|---|---|---|---|---|---|---|---|---|---|---|---|---|---|---|---|---|---|---|---|---|---|---|---|---|-------------|---|---|---|---|------------|---------------|---------------|----|------|----------|----------|----------|----------|----------|----------|
|        | 1                | 1 | 1 | 1 | 1 | 2 | 2 | 2 | 2 | 2 | 2 | 2 | 3 | 3 | 3 | 3 | 3 | 3 | 3 | 3 | 3 | 3 | 3 | 4 | 4 | 4 | 4 | 4 |             |   |   |   |   |            |               |               |    |      |          |          |          |          |          |          |
|        | 5                | 6 | 3 | 6 | 9 | 3 | 0 | 1 | 0 | 2 | 5 | 6 | 6 | 1 | 4 | 0 | 3 | 7 | 0 | 6 | 2 | 4 | 0 | 4 | 8 | 1 | 0 | 5 | 8           | 4 | 2 | 2 | 3 | 2          | B             | D             | A  | C    | F        | total    | %        |          |          |          |
| Hap_1  | A                | A | T | T | G | G | T | T | A | T | T | C | C | T | A | C | A | A | A | T | T | G | A | G | T | C | T | T | G           | A | A | A | T | A          |               |               | 3  | 1    |          | 4        | 3.77     | KT336389 |          |          |
| Hap_2  | G                | . | . | . | . | . | . | . | . | . | . | . | C | . | . | . | . | . | . | . | . | . | . | . | . | . | . | . | .           | . | . | . | . | .          |               |               | 4  | 2    | 7        | 6        | 2        | 21       | 19.81    | KT336390 |
| Hap_3  | .                | . | . | . | . | . | . | . | . | . | . | . | . | . | . | . | . | . | . | . | . | . | . | . | . | . | . | . | .           | G | . | . | . | .          | .             |               |    | 1    |          |          | 1        | 0.94     | KT336391 |          |
| Hap_4  | G                | . | . | . | . | . | . | G | . | . | . | . | . | . | . | . | . | . | C | . | . | . | . | . | . | . | . | . | .           | . | . | . | . | .          |               |               | 4  | 1    |          | 5        | 4.72     | KT336392 |          |          |
| Hap_5  | G                | . | . | . | . | . | . | . | . | . | . | . | . | . | . | . | . | . | . | . | . | . | . | . | . | . | . | . | .           | . | . | . | . | .          |               |               | 2  | 12   | 3        | 6        | 5        | 28       | 26.42    | KT336393 |
| Hap_6  | G                | . | . | . | A | . | . | . | . | . | . | . | . | . | . | . | . | . | . | . | . | . | . | . | . | . | . | . | .           | . | . | . | . | .          |               |               | 1  |      |          | 1        | 0.94     | KT336394 |          |          |
| Hap_7  | G                | . | . | . | . | . | C | . | . | . | . | . | . | T | . | . | . | . | . | C | . | . | . | . | . | . | . | . | .           | . | . | . | . |            |               | 1             | 1  |      | 2        | 1.89     | KT336395 |          |          |          |
| Hap_8  | G                | . | . | . | . | . | G | . | . | . | . | . | . | . | G | . | . | G | C | . | . | . | . | . | . | . | . | . | G           | . | . | . | . |            |               | 2             | 1  |      | 3        | 2.83     | KT336396 |          |          |          |
| Hap_9  | .                | . | . | . | . | C | G | . | . | . | . | . | . | . | . | . | . | . | C | . | . | . | . | . | . | . | . | A | .           | . | . | . | . |            |               | 2             | 1  |      | 3        | 2.83     | KT336397 |          |          |          |
| Hap_10 | G                | . | C | . | . | . | . | . | . | . | . | C | . | . | . | . | . | . | . | . | . | . | . | . | . | . | . | . | .           | . | . | . | . |            |               | 1             |    |      | 1        | 0.94     | KT336398 |          |          |          |
| Hap_11 | G                | . | . | A | . | . | G | . | . | . | . | . | . | . | . | . | . | . | . | . | . | . | . | . | . | . | . | . | .           | . | . | . | . |            |               | 3             |    |      | 3        | 2.83     | KT336399 |          |          |          |
| Hap_12 | G                | . | . | . | . | . | G | . | . | . | . | . | . | . | . | . | . | . | . | . | . | . | . | . | . | . | . | . | .           | . | . | . | . |            |               | 1             |    |      | 1        | 4        | 6        | 5.66     | KT336400 |          |
| Hap_13 | G                | . | . | . | . | . | . | . | . | . | . | . | . | . | . | . | . | . | . | . | . | . | . | . | C | . | . | . | .           | . | . | . |   |            | 1             |               |    | 1    | 0.94     | KT336401 |          |          |          |          |
| Hap_14 | G                | . | G | . | . | . | G | C | C | . | . | . | . | . | . | . | . | G | C | . | . | . | . | . | . | . | . | . | .           | . | . | . | . |            |               | 1             |    |      | 1        | 0.94     | KT336402 |          |          |          |
| Hap_15 | .                | . | . | . | . | . | . | . | . | . | . | . | . | . | G | . | . | . | . | . | . | . | . | . | . | . | . | . | .           | . | . | . | . |            |               | 1             |    |      | 1        | 0.94     | KT336403 |          |          |          |
| Hap_16 | G                | . | . | . | . | . | . | . | . | . | . | C | . | . | . | . | . | . | . | . | . | . | . | . | . | . | . | . | .           | T | . | . |   |            | 1             |               |    | 1    | 0.94     | KT336404 |          |          |          |          |
| Hap_17 | G                | . | . | . | . | . | G | . | . | . | . | . | . | . | . | . | . | C | . | G | . | . | . | . | . | . | . | . | .           | . | . | . |   |            | 1             |               |    | 3    | 2        | 6        | 5.66     | KT336405 |          |          |
| Hap_18 | .                | . | . | . | . | C | G | . | . | . | . | . | . | . | . | . | . | C | . | . | . | . | . | . | . | . | . | . | .           | . | . | . |   |            |               |               | 1  | 2    | 3        | 2.83     | KT336406 |          |          |          |
| Hap_19 | G                | . | . | . | . | . | . | . | . | . | C | . | . | . | . | . | . | . | . | . | . | . | . | . | T | . | . | . | .           | . | . | . |   |            |               |               | 1  |      | 1        | 0.94     | KT336407 |          |          |          |
| Hap_20 | G                | . | . | . | . | . | . | . | . | . | . | . | . | . | . | . | . | . | C | . | . | . | . | . | . | . | . | . | .           | . | . |   |   | 1          |               |               | 1  |      | 2        | 1.89     | KT336408 |          |          |          |
| Hap_21 | G                | . | . | . | . | . | G | . | . | T | . | . | . | . | . | . | . | . | . | . | . | . | . | . | . | . | . | . | .           | . | . | . |   |            | 2             |               |    | 2    | 1.89     | KT336409 |          |          |          |          |
| Hap_22 | .                | . | . | . | . | . | . | . | . | . | . | . | . | . | G | . | . | . | . | . | . | . | . | . | . | . | . | . | .           | . | . | . |   |            | 5             |               |    | 5    | 4.72     | KT336410 |          |          |          |          |
| Hap_23 | G                | . | . | . | . | . | G | . | . | . | . | . | . | . | . | . | . | C | A | . | C | . | . | . | . | . | . | . | .           | . | . |   |   | 2          |               |               | 2  | 1.89 | KT336411 |          |          |          |          |          |
| Hap_24 | G                | . | . | . | . | . | G | . | . | . | . | . | T | . | . | . | . | . | A | . | . | . | . | . | . | . | . | . | .           | G | . |   |   | 1          |               |               | 1  | 0.94 | KT336412 |          |          |          |          |          |
| Hap_25 | G                | G | . | . | . | . | G | . | . | . | . | . | . | . | . | . | . | C | . | . | . | . | . | . | . | . | . | . | .           | . | . |   |   |            |               |               | 1  |      | 1        | 0.94     | KT336413 |          |          |          |
| Hap_26 | G                | . | C | A | . | . | . | . | . | . | . | C | . | . | . | . | . | . | . | . | . | . | . | . | . | . | . | . | .           | . | . |   |   |            |               |               | 1  |      | 1        | 0.94     | KT336414 |          |          |          |
| Hap_27 | .                | . | . | . | . | . | . | . | . | . | C | . | . | . | . | . | . | . | . | . | . | . | . | . | . | . | . | . | .           | . | . |   |   |            |               |               | 1  |      | 1        | 0.94     | KT336415 |          |          |          |
| Hap_28 | G                | . | . | A | . | . | . | . | . | . | C | . | . | . | . | . | . | . | . | . | . | . | . | . | . | . | . | G | .           | . | . |   |   |            |               |               | 1  |      | 1        | 0.94     | KT336416 |          |          |          |
| Total  |                  |   |   |   |   |   |   |   |   |   |   |   |   |   |   |   |   |   |   |   |   |   |   |   |   |   |   |   |             |   |   |   |   | 17         | 27            | 22            | 23 | 19   | 108      | 100.00   |          |          |          |          |
